# Supplementary material for: Bandgap tunable Zn1−xMgxO thin films as electron transport layers for high performance quantum dot light-emitting diodes
Source: Royal Society of Chemistry journal article supplement (doi:10.1039/c7tc00453b), 2017-01-01
Supplement: c7tc00453b1.pdf [file c7tc00453b1.pdf]

## Electronic Supplementary Information

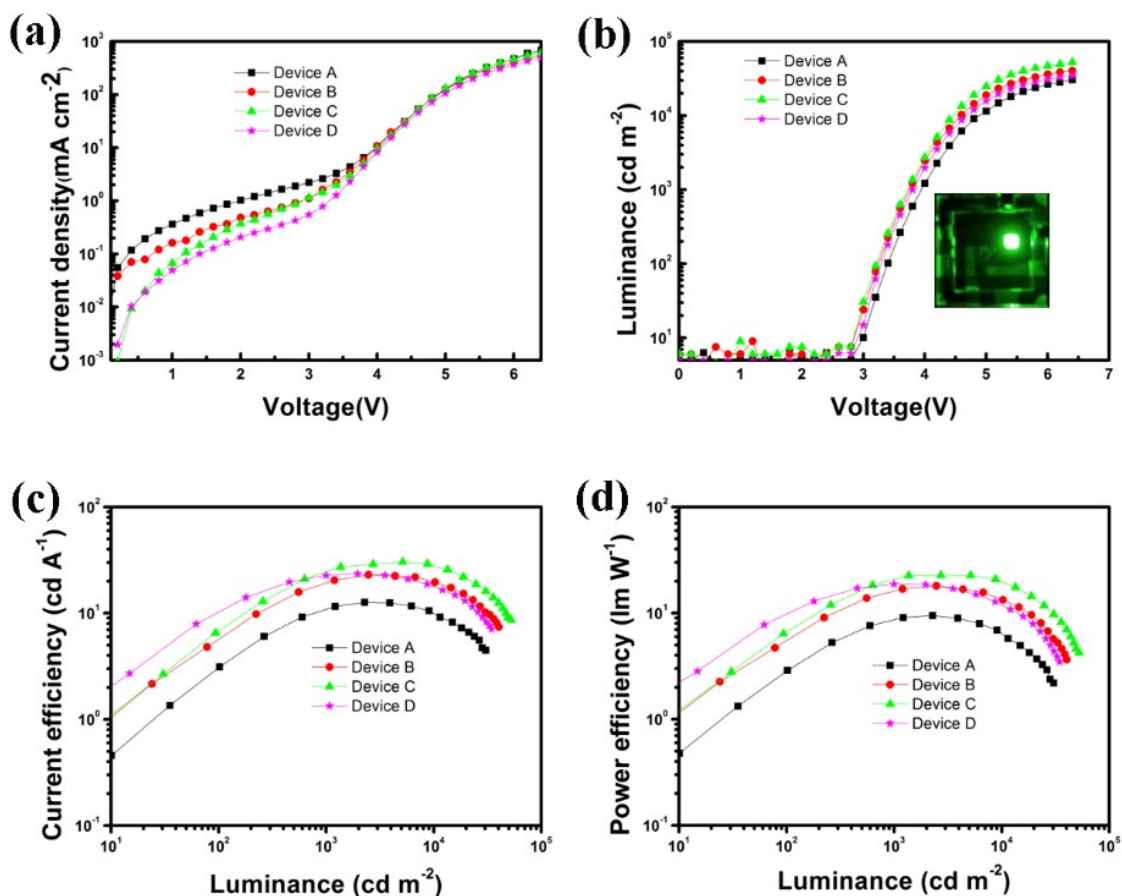

S1. Electroluminescence performance of MZO based green QLEDs: (a) Current density ( $J$ ) versus driving voltage ( $V$ ), (b) Luminance ( $L$ ) versus driving voltage ( $V$ ), (c) Current efficiency, and (d) Power efficiency of QLED (Device A :  $x=0$ , Device B :  $x=0.01$ , Device C :  $x=0.02$ , Device D :  $x=0.05$ ).

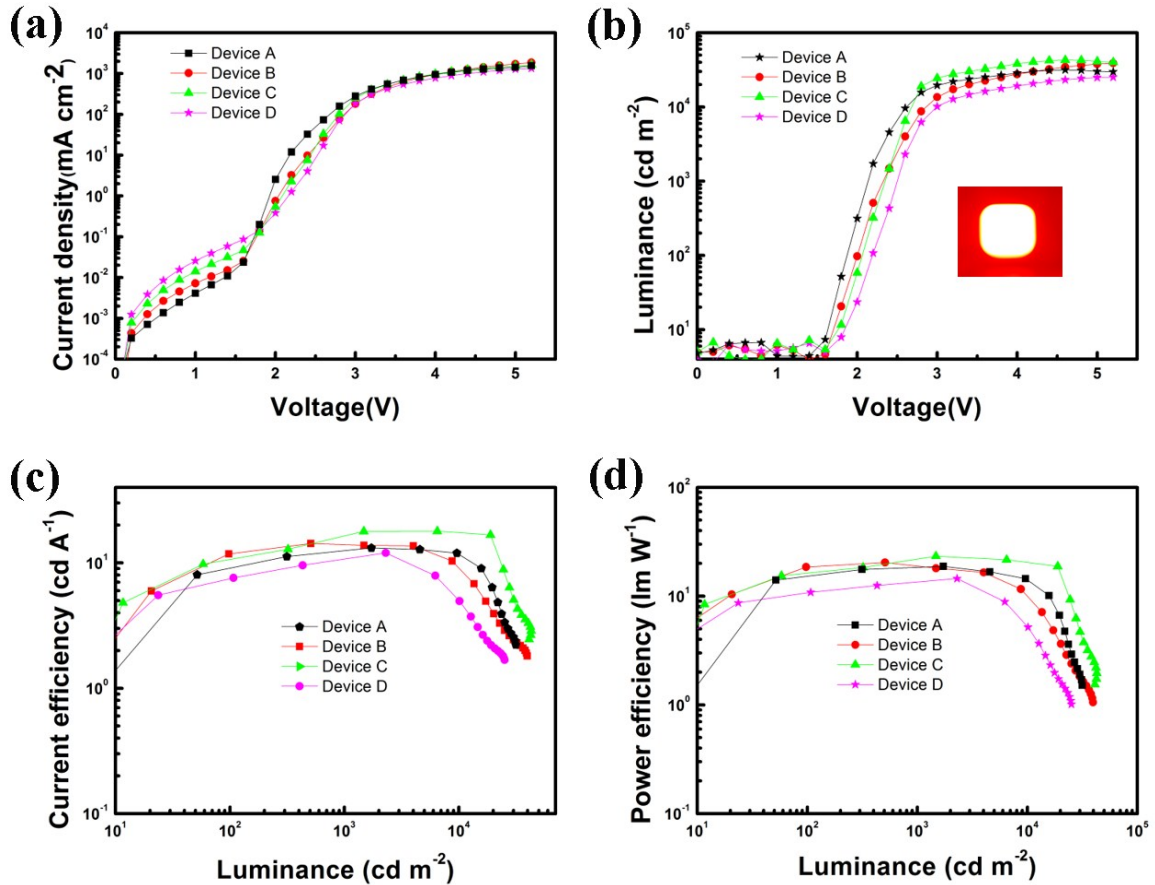

**S2.** Electroluminescence performance of red QLEDs based on MZO/ Cs<sub>2</sub>CO<sub>3</sub>: (a) Current density(J) versus driving voltage (V), (b) Luminance (L versus driving voltage(V) , (c) Current efficiency , and (d) Power efficiency of QLED (Cs<sub>2</sub>CO<sub>3</sub> doping ratio of Device A: 0, Device B: 0.1 wt%, Device C: 0.25 wt%, Device D: 0.5 wt%).

| QLED     | L <sub>max</sub><br>(cd m <sup>-2</sup> ) | η <sub>A</sub> (cd A <sup>-1</sup> ) |                           | η <sub>P</sub> (lm W <sup>-1</sup> ) |                           | η <sub>EQE</sub> (%) |                           |
|----------|-------------------------------------------|--------------------------------------|---------------------------|--------------------------------------|---------------------------|----------------------|---------------------------|
|          |                                           | Peak                                 | @1,000 cd m <sup>-2</sup> | Peak                                 | @1,000 cd m <sup>-2</sup> | Peak                 | @1,000 cd m <sup>-2</sup> |
| Device A | 31,545                                    | 13.16                                | 12.24                     | 18.80                                | 18.56                     | 9.64                 | 9.19                      |
| Device B | 39,600                                    | 14.26                                | 14.09                     | 20.23                                | 18.86                     | 10.45                | 10.20                     |
| Device C | 42,910                                    | 17.87                                | 17.24                     | 23.32                                | 22.95                     | 13.09                | 12.01                     |
| Device D | 25,188                                    | 12.01                                | 10.83                     | 14.51                                | 13.68                     | 8.80                 | 7.89                      |

**S3.** Summary of electroluminescence performance, maximum luminance (L<sub>max</sub> ), current efficiency(η<sub>A</sub>), power efficiency (η<sub>P</sub> ) and EQE (η<sub>EQE</sub>) of red QLED devices based on MZO/ Cs<sub>2</sub>CO<sub>3</sub>(Cs<sub>2</sub>CO<sub>3</sub> doping ratio of Device A: 0, Device B: 0.1 wt%, Device C: 0.25 wt%, Device D: 0.5 wt%).
